# Supplementary material
Source: Springer Nature journal article supplement (https://www.springermedizin.de/resource/supplementary/13058_2014_3424_MOESM6_ESM.pdf/9704150)

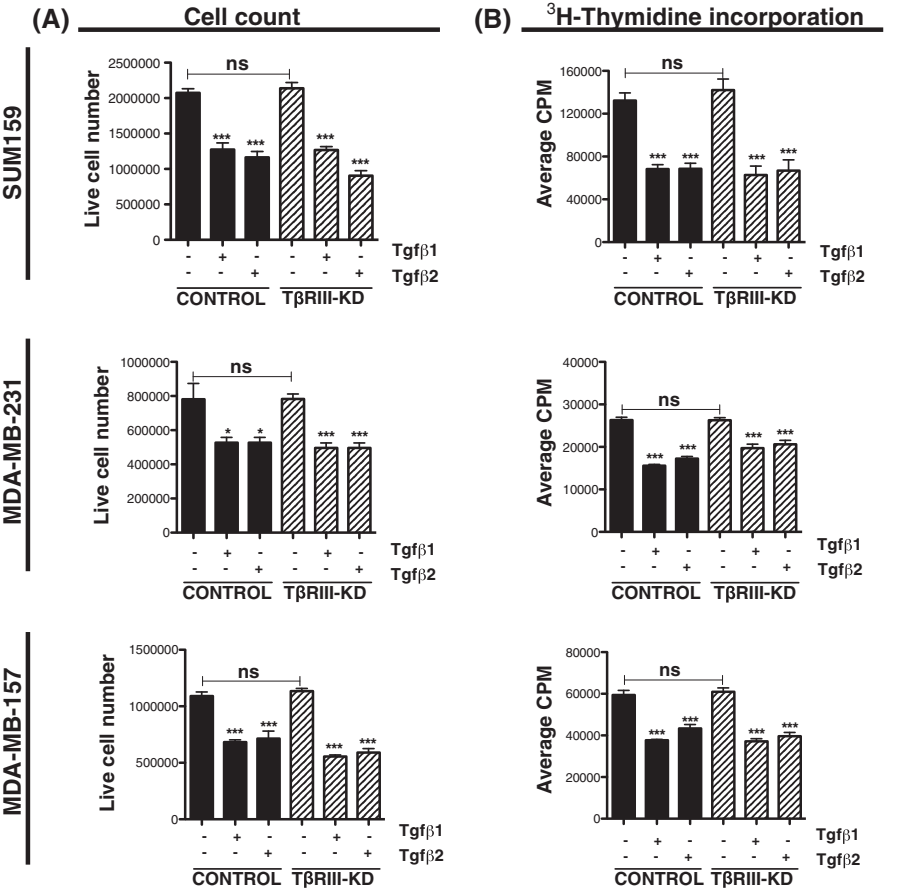

**(C)**

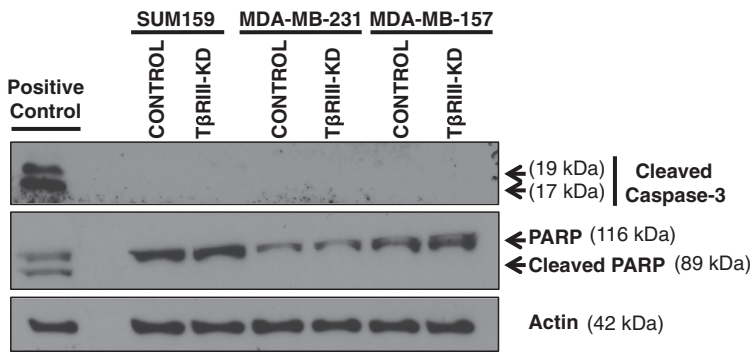

Supplement: MOESM6 [file 9704150]
